# Supplementary material for: Multimodal Approaches for the Improvement of the Cellular Folding of a Recombinant Iron Regulatory Protein in E. Coli
Source: Research Square preprint supplement (doi:10.21203/rs.3.rs-847274/v1), 2021-09-07
Supplement: Supplementary file 1 [file f404782779cb597e86075a0f.docx]

**Table S1. Plasmids used in this study**

| Plasmid | Gene cloned | Promoter | Antibiotic resistance | References |
| --- | --- | --- | --- | --- |
| pQE60Aco | Aconitase | *Lac* | Ampicillin | Chaudhuri, *et al.*, 2001 |
| pETAco | Aconitase | T7*lac* | Kanamycin | This study |
| pGro7 | GroEL/ES | *arab* | Chloramphenicol | Nishihara, *et al.*, 1998. |

**Table S2 Primer sequence designed for PCR amplification of aconitase gene**

| Primers | Sequence # |
| --- | --- |
| Forward Primer | 5’ TTA**CATATG**CTGGATTCAAAAGTCAACC 3’ |
| Reverse Primer | 5’ TTT**AAGCTT**TTATTTCTTCTCATCGGC 3’ |

# The bold sequences are the restriction digestion recognition sites for *Nde*I and *Xho*I in the forward and reverse primers respectively

**Table S3. Effect of temperature on the specific growth rate of the induced cells**

| Temperature  (°C) | Specific growth rate of cells expressing (h-1) | |
| --- | --- | --- |
| **Aconitase** | **Aconitase & GroEL/ES** |
| 37 °C | 0.412 (0.92#) | 0.479 (0.89) |
| 30 °C | 0.34 (0.92) | 0.377 (0.95) |
| 25 °C | 0.32 (0.9) | 0.36 (0.9) |
| 16 °C | 0.274 (0.95) | 0.311 (0.97) |

# The regression coefficients are provided in brackets.
